# Supplementary material for: Effects of intermetal distance on the electrochemistry-induced surface coverage of M–N–C dual-atom catalysts
Source: Royal Society of Chemistry journal article supplement (doi:10.1039/d3cc03208f), 2023-01-01
Supplement: d3cc03208f1.pdf [file d3cc03208f1.pdf]

## Electronic Supplementary Information

### Effects of Intermetal Distance on the Electrochemistry-induced Surface Coverage of M–N–C Dual-Atom Catalysts

Weijie Yang<sup>\*a</sup>, Zhenhe Jia<sup>a</sup>, Liugang Chen<sup>a</sup>, Binghui Zhou<sup>a</sup>, Di Zhang<sup>b</sup>, Yulan Han<sup>c</sup>, Zhengyang Gao<sup>a</sup>, and Hao Li<sup>\*b</sup>

<sup>a</sup> *Department of Power Engineering, School of Energy, Power and Mechanical Engineering, North China Electric Power University, Baoding 071003, China.*

<sup>b</sup> *Advanced Institute for Materials Research (WPI-AMR), Tohoku University, Sendai 980–8577, Japan.*

<sup>c</sup> *School of Chemistry and Chemical Engineering, Queen's University Belfast, Belfast BT9 5AG, UK.*

*Corresponding Author: [yangwj@ncepu.edu.cn](mailto:yangwj@ncepu.edu.cn); [li.hao.b8@tohoku.ac.jp](mailto:li.hao.b8@tohoku.ac.jp)*

## Computational Methods

In this study, all DFT calculations were performed utilizing the Vienna ab initio simulation package (VASP 5.4.4) with the Perdew–Burke–Ernzerhof (PBE) functional and projector-augmented wave (PAW) potentials, which have been demonstrated to be suitable for graphene-based materials. The effects of spin-polarization and van der Waals dispersion were included in the calculations. A  $12.33 \text{ \AA} \times 12.83 \text{ \AA}$  graphene with a vacuum layer of  $20 \text{ \AA}$  was modelled to simulate the catalyst surface. In structural optimization, a  $2 \times 2 \times 1$   $\Gamma$ -centred k-point mesh grid and 450 eV energy cutoff were employed. The convergence criteria for energy and force were set to  $10^{-5}$  eV and  $0.02 \text{ eV/\AA}$ , respectively. To achieve higher accuracy, a  $4 \times 4 \times 1$   $\Gamma$ -centred k-point mesh grid was adopted for the subsequent self-consistent field calculations.

To evaluate the stability of DACs, binding energy ( $E_b$ ), formation energy ( $E_f$ ), and cohesive energy ( $E_{\text{coh}}$ ) were calculated. The equations for calculating the  $E_b$ ,  $E_f$ , and  $E_{\text{coh}}$  are defined as the following:<sup>1,2,3</sup>

$$E_b = (E_{\text{slab}} - E_{\text{NC}} - \Sigma E_{\text{metal}}) / 2$$

$$E_f = E_{\text{slab}} - x\mu_{\text{N}} - y\mu_{\text{C}} - \Sigma\mu_{\text{metal}}$$

$$E_{\text{coh}} = \frac{E_{\text{metal-bulk}}}{n} - E_{\text{metal-single}}$$

where  $E_{\text{slab}}$ ,  $E_{\text{NC}}$ , and  $E_{\text{metal}}$  are the electronic energies of the catalyst, graphene substrate, and metal atoms, respectively.  $x$  and  $y$  represent the total numbers for N and C, respectively.  $\mu_{\text{N}}$  and  $\mu_{\text{C}}$  denote the chemical potentials of N and C atoms, which were obtained from  $\text{N}_2$  molecular and pristine graphene, respectively. Considering the impact of temperature and pressure on chemical potential, herein, the energy of  $\text{N}_2$  was calculated under the standard state ( $T = 298.15 \text{ K}$ ,  $p = 100 \text{ kPa}$ ).<sup>6-10</sup>  $E_{\text{metal-bulk}}$  and  $E_{\text{metal-single}}$  represent the metal energies calculated from bulk and a single atom, respectively.

The Gibbs free energy changes ( $\Delta G$ ) of the intermediates were calculated based on the computational hydrogen electrode (CHE) model by Nørskov et al., in which the chemical potential of ( $\text{H}^+ + \text{e}^-$ ) pair is related to half of the  $\text{H}_2$  gas molecule under standard conditions.<sup>4</sup> Therefore,  $\Delta G$  can be determined using the following equation:

$$\Delta G = \Delta E + \Delta \text{ZPE} - T\Delta S + \Delta G_{\text{U}} + \Delta G_{\text{pH}}$$

where  $\Delta E$  is the difference of electronic energy in the ground state obtained from self-consistent calculations;  $\Delta \text{ZPE}$  and  $\Delta S$  are the difference in zero-point energy and entropy, respectively;  $T$  is the temperature (*i.e.*,

298.15 K);  $\Delta G_U$  is the free energy contribution related to the applied potential.  $\Delta G_{pH}$  is the correction of the free energy of hydrogen ion concentration:  $\Delta G_{pH} = k_B \times T \times \ln 10 \times \text{pH}$ , where  $k_B$  is the Boltzmann constant ( $8.617343 \times 10^{-5} \text{ eV K}^{-1}$ ).<sup>5</sup>

Based on the equilibrium between adsorption and aqueous solution, the free energy changes can be determined using the following equation:

$$\Delta G = G_{P^*} + mG_{H_2O} - G_{P-O_mH_n^*} - (2m - n)(0.5G_{H_2} - U_{SHE} - 2.303 k_B T \text{pH})$$

where  $G_{P^*}$ ,  $G_{P-O_mH_n^*}$ ,  $G_{H_2O}$ , and  $G_{H_2}$  are the Gibbs free energies of the pristine surface, coverage surface,  $H_2O$ , and  $H_2$ , respectively.  $m$  and  $n$  represent the numbers of O and H in the adsorbate, respectively.  $U_{SHE}$  is the potential vs. standard hydrogen electrode (SHE).

To describe the capability of attracting electrons of different DACs, the system electronegativity ( $X$ ) was calculated using the following equation:

$$X = (xX_N + yX_C - \Sigma X_{Metal}) \times \frac{\Sigma \theta_d}{\Sigma n_d}$$

where  $x$  and  $y$  are the number of N and C adjacent to the embedded metal atom;  $X_C$ ,  $X_N$  and  $X_{Metal}$  are the electronegativity of the carbon, nitrogen, and metal atoms, respectively;  $\theta_d$  is the number of occupied electrons of the  $d$  orbitals of metal atoms;  $n_d$  is the maximum number of electrons in the  $d$  orbitals.

**Table S1.** Electronic energies (E) of the species at 298.15 K in this work which applied to calculate the chemical potential. The energy of the gas phase N<sub>2</sub> was calculated under the standard state (T = 298.15 K, p = 100 kPa).<sup>6-10</sup> All values are given in eV.

| Species               | E (eV)  |
|-----------------------|---------|
| N <sub>2</sub>        | -17.05  |
| Graphene (60 C atoms) | -533.40 |
| Fe                    | -3.46   |
| Co                    | -1.98   |

**Table S2.** Contributions to the adsorption free energy from the zero-point energy corrections, enthalpic (heat capacity) corrections, and entropic corrections. All values are given in eV.

| Adsorbate | ZPE   | TS     | $\int C_p dT$ | $\Delta G$ |
|-----------|-------|--------|---------------|------------|
| H*        | 0.219 | -0.009 | -0.001        | 0.226      |
| O*        | 0.084 | 0.039  | 0.024         | 0.069      |
| HO*       | 0.370 | 0.078  | 0.043         | 0.335      |

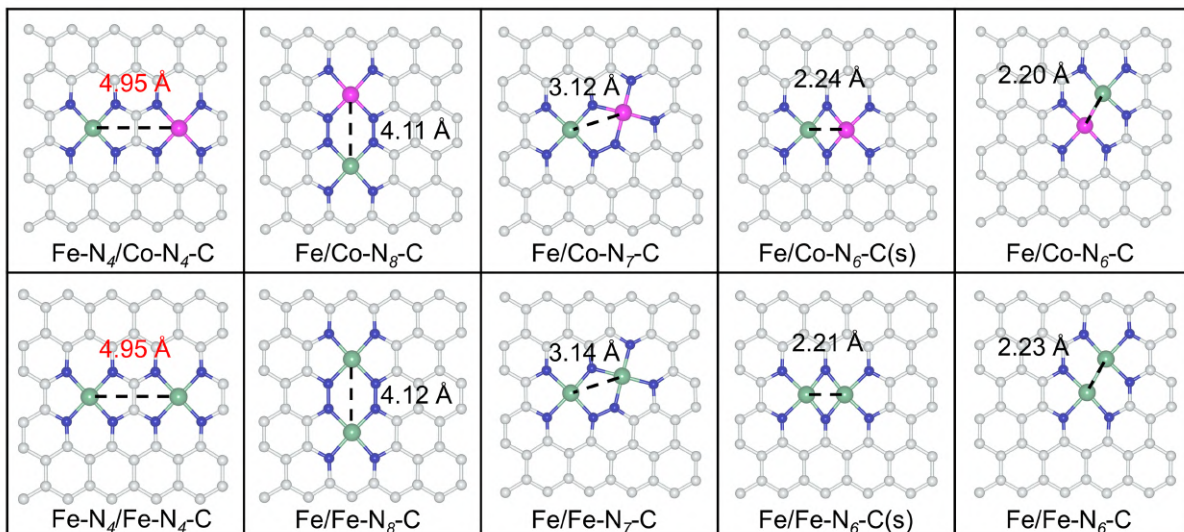

**Fig. S1.** Geometric configurations of DAC and DAC-like materials, where green, violet, blue, and silvery spheres represent Fe, Co, N, and C, respectively.

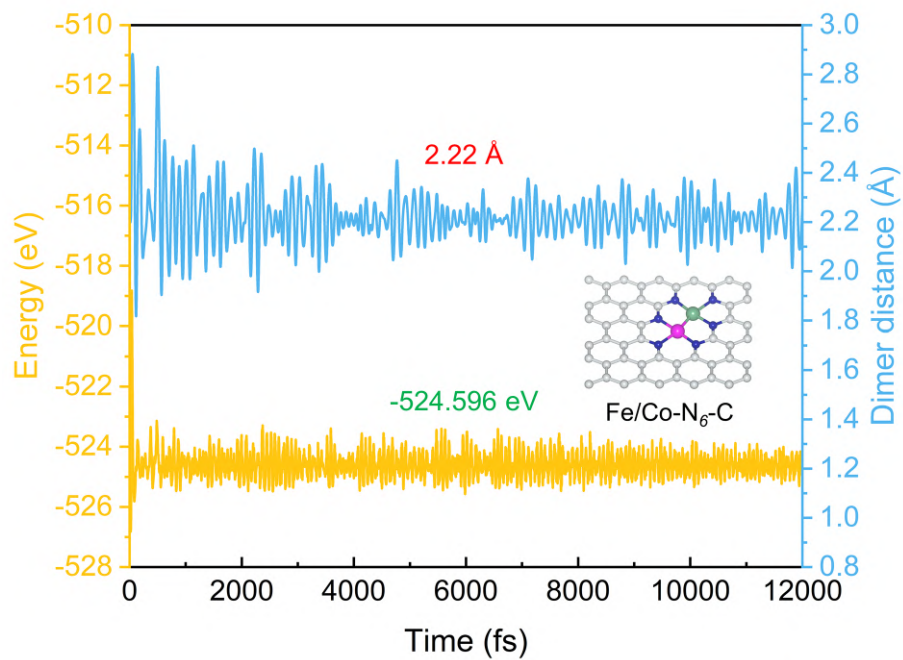

**Fig. S2.** System energies and the average intermetal distances of Fe/Co-N<sub>6</sub>-C during AIMD simulations, where green, violet, blue, and silvery spheres represent Fe, Co, N, and C, respectively.

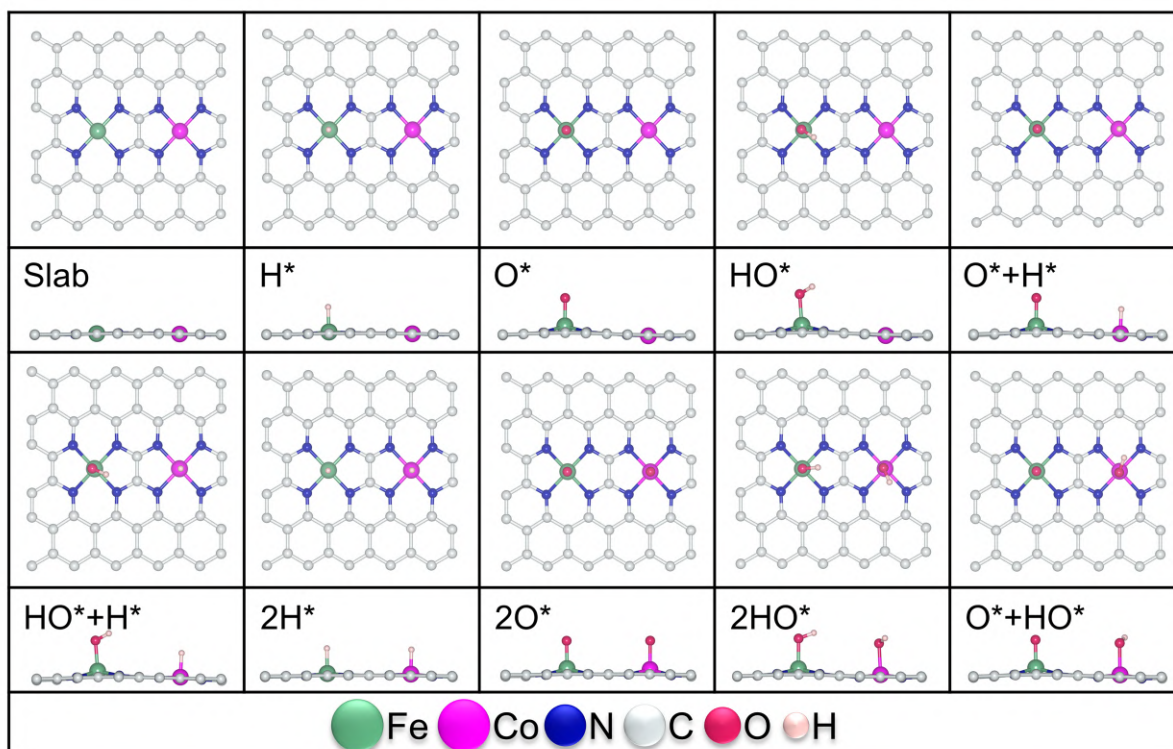

**Fig. S3.** Adsorption configurations of Fe-N<sub>4</sub>/Co-N<sub>4</sub>-C where green, violet, blue, silvery, red, and light pink spheres represent Fe, Co, N, C, O, and H, respectively.



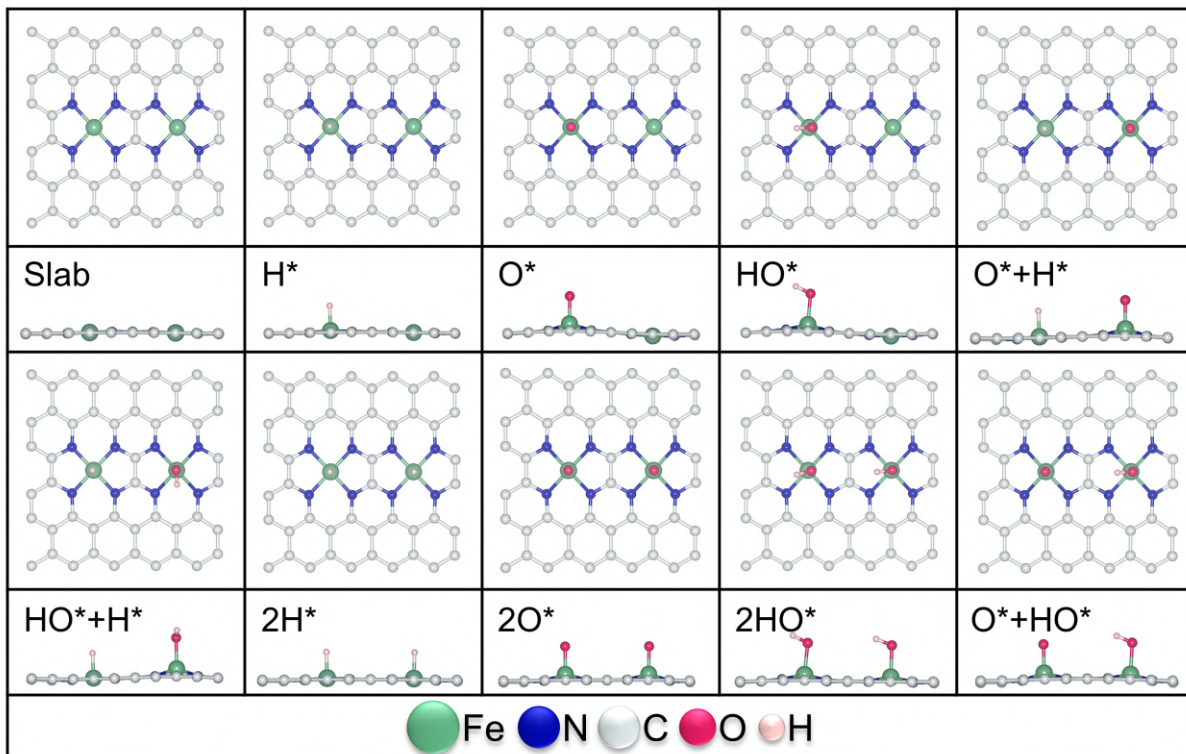

**Fig. S4.** Adsorption configurations of Fe-N<sub>4</sub>/Fe-N<sub>4</sub>-C where green, blue, silvery, red, and light pink spheres represent Fe, N, C, O, and H, respectively.

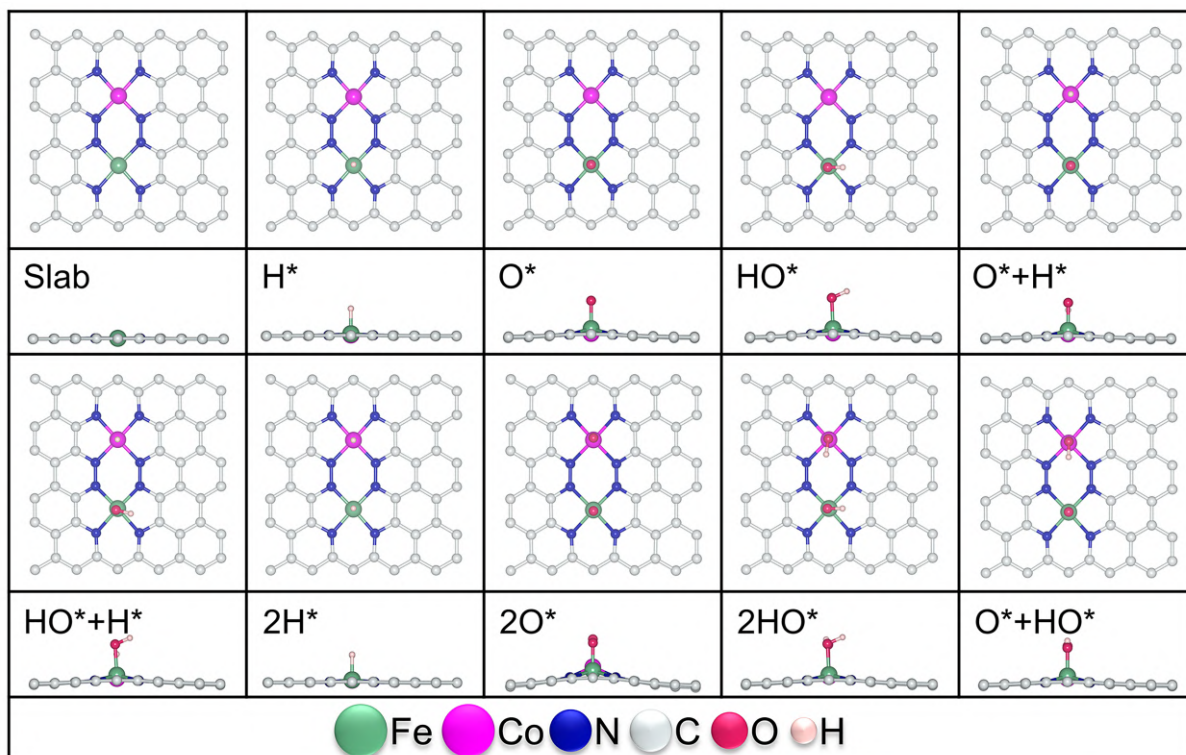

**Fig. S5.** Adsorption configurations of Fe/Co-N<sub>8</sub>-C where green, violet, blue, silvery, red, and light pink spheres represent Fe, Co, N, C, O, and H, respectively.

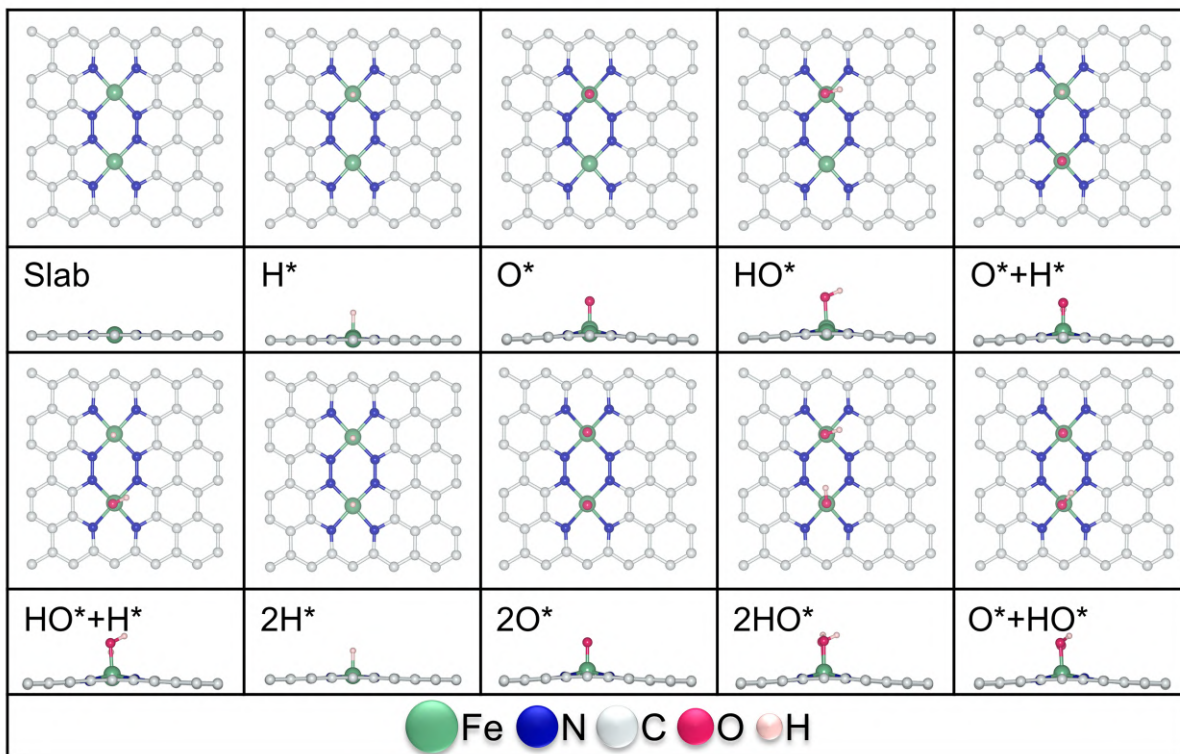

**Fig. S6.** Adsorption configurations of Fe/Fe-N<sub>8</sub>-C where green, blue, silvery, red, and light pink spheres represent Fe, N, C, O, and H, respectively.

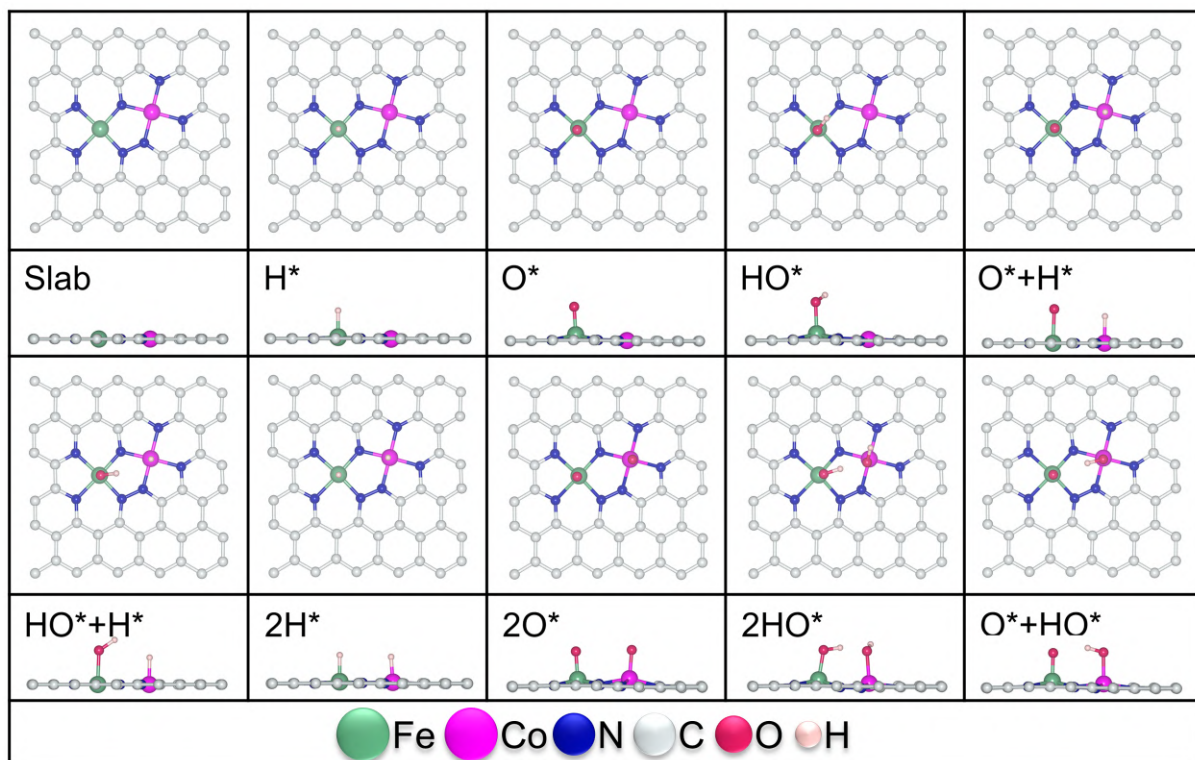

**Fig. S7.** Adsorption configurations of Fe/Co-N<sub>7</sub>-C where green, violet, blue, silvery, red, and light pink spheres represent Fe, Co, N, C, O, and H, respectively.



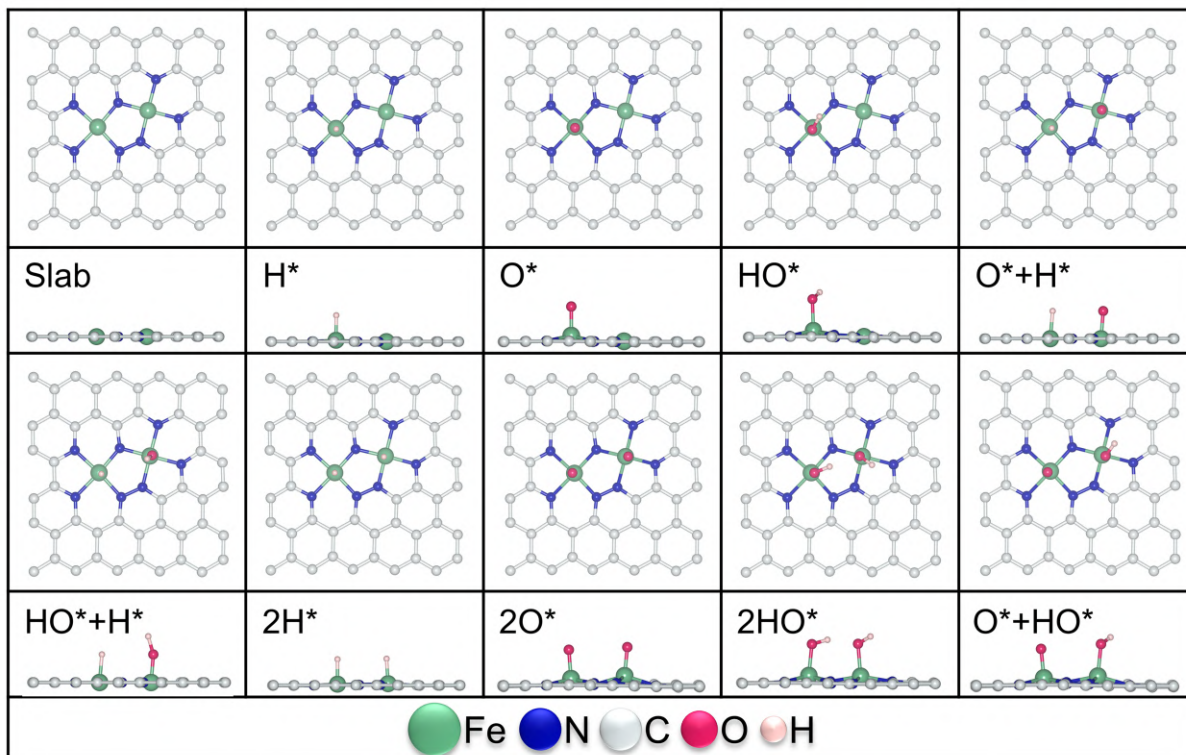

**Fig. S8.** Adsorption configurations of Fe/Fe-N<sub>7</sub>-C where green, blue, silvery, red, and light pink spheres represent Fe, N, C, O, and H, respectively.

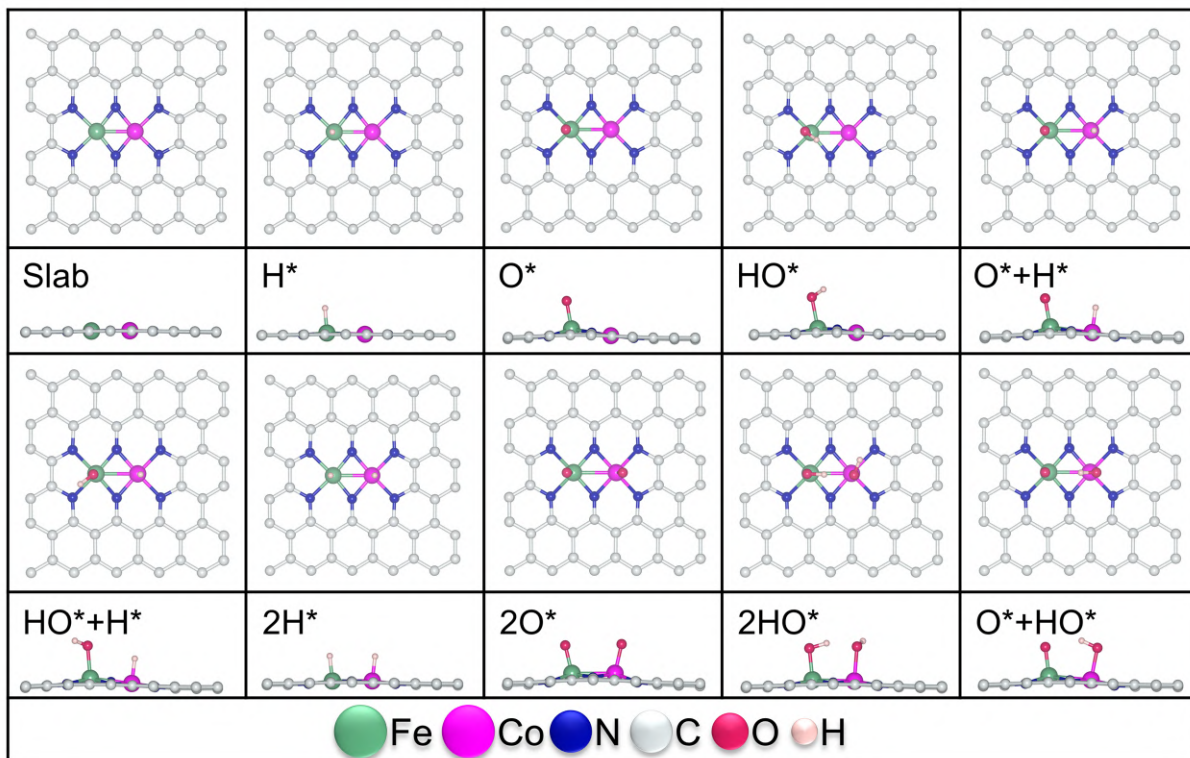

**Fig. S9.** Adsorption configurations of Fe/Co-N<sub>6</sub>-C (s) where green, violet, blue, silvery, red, and light pink spheres represent Fe, Co, N, C, O, and H, respectively.

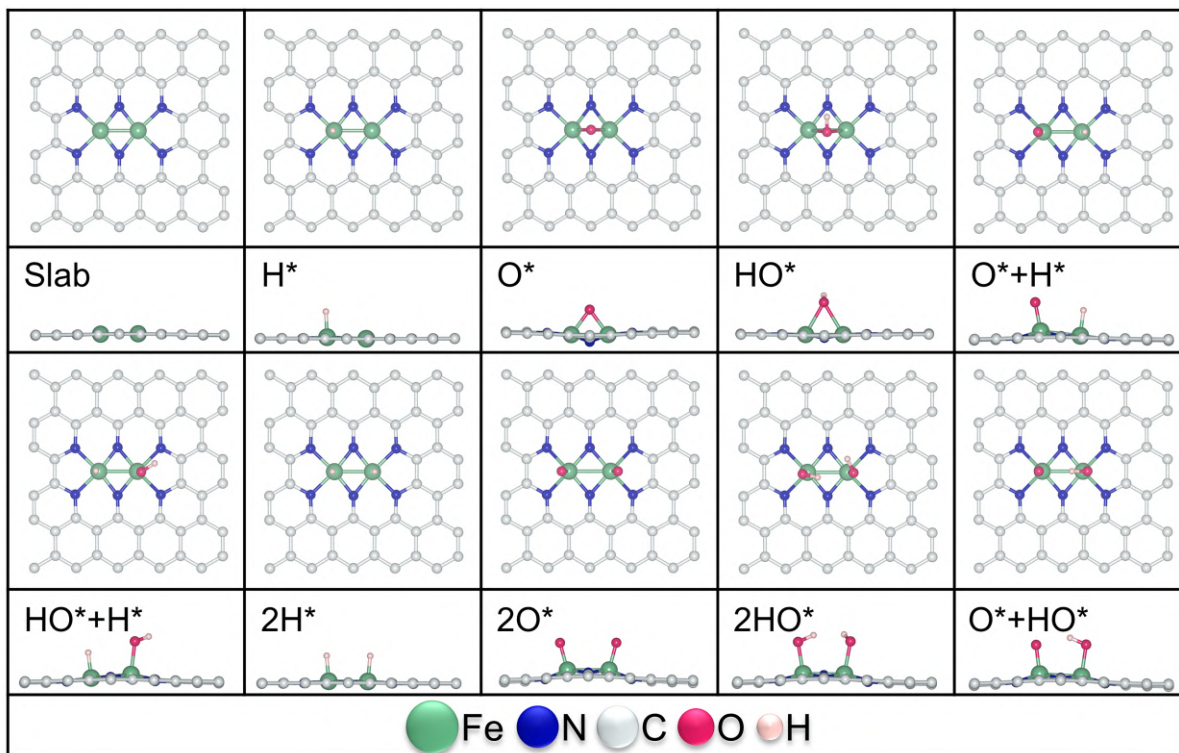

**Fig. S10.** Adsorption configurations of Fe/Fe-N<sub>6</sub>-C (s) where green, blue, silvery, red, and light pink spheres represent Fe, N, C, O, and H, respectively.

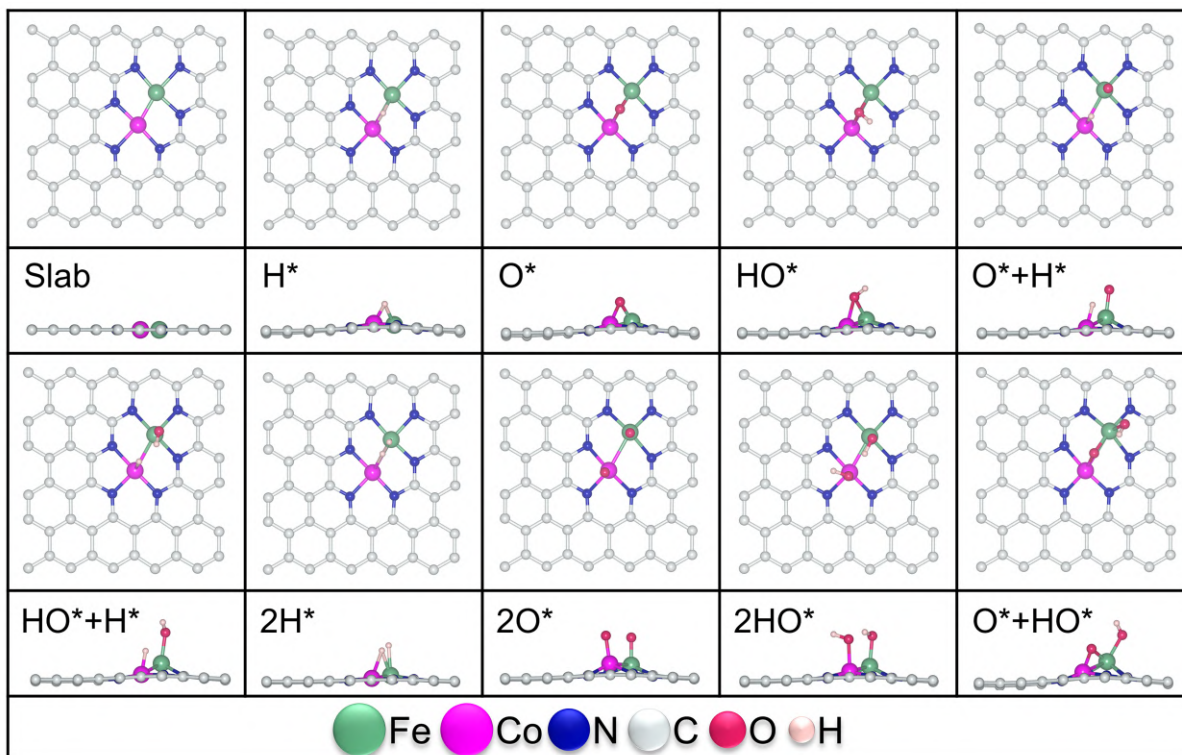

**Fig. S11.** Adsorption configurations of Fe/Co-N<sub>6</sub>-C where green, violet, blue, silvery, red, and light pink spheres represent Fe, Co, N, C, O, and H, respectively.



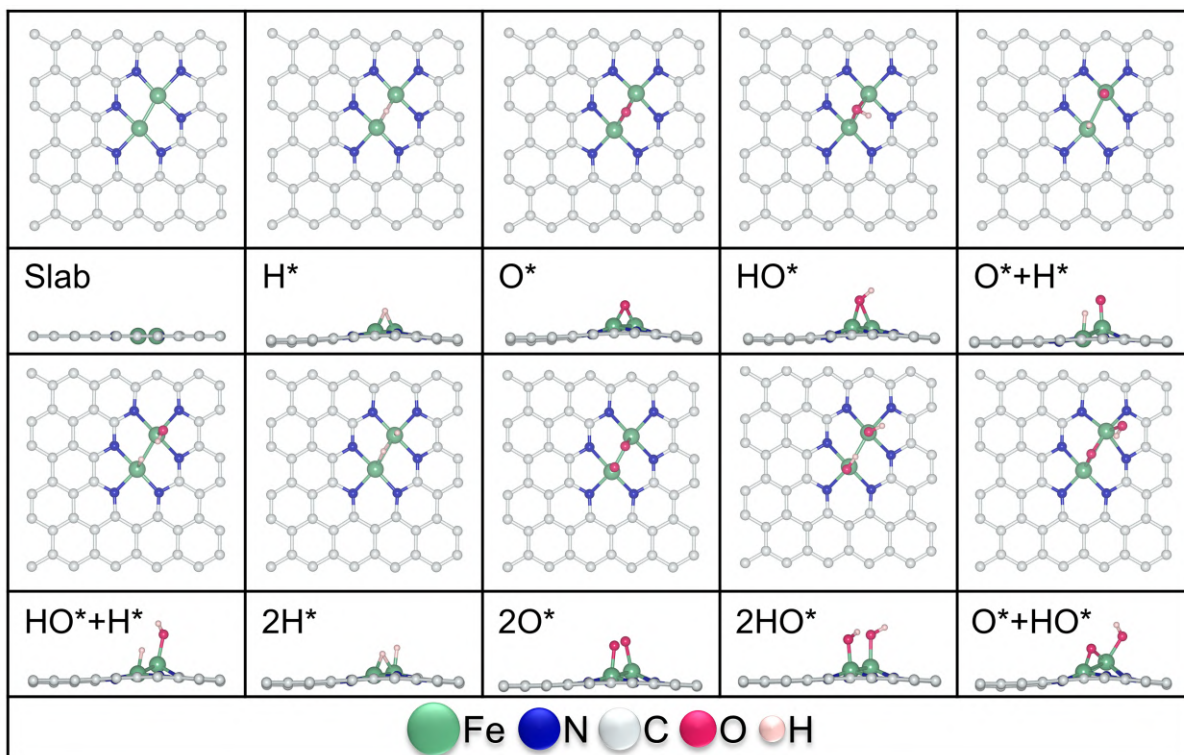

**Fig. S12.** Adsorption configurations of Fe/Fe-N<sub>6</sub>-C where green, blue, silvery, red, and light pink spheres represent Fe, N, C, O, and H, respectively.

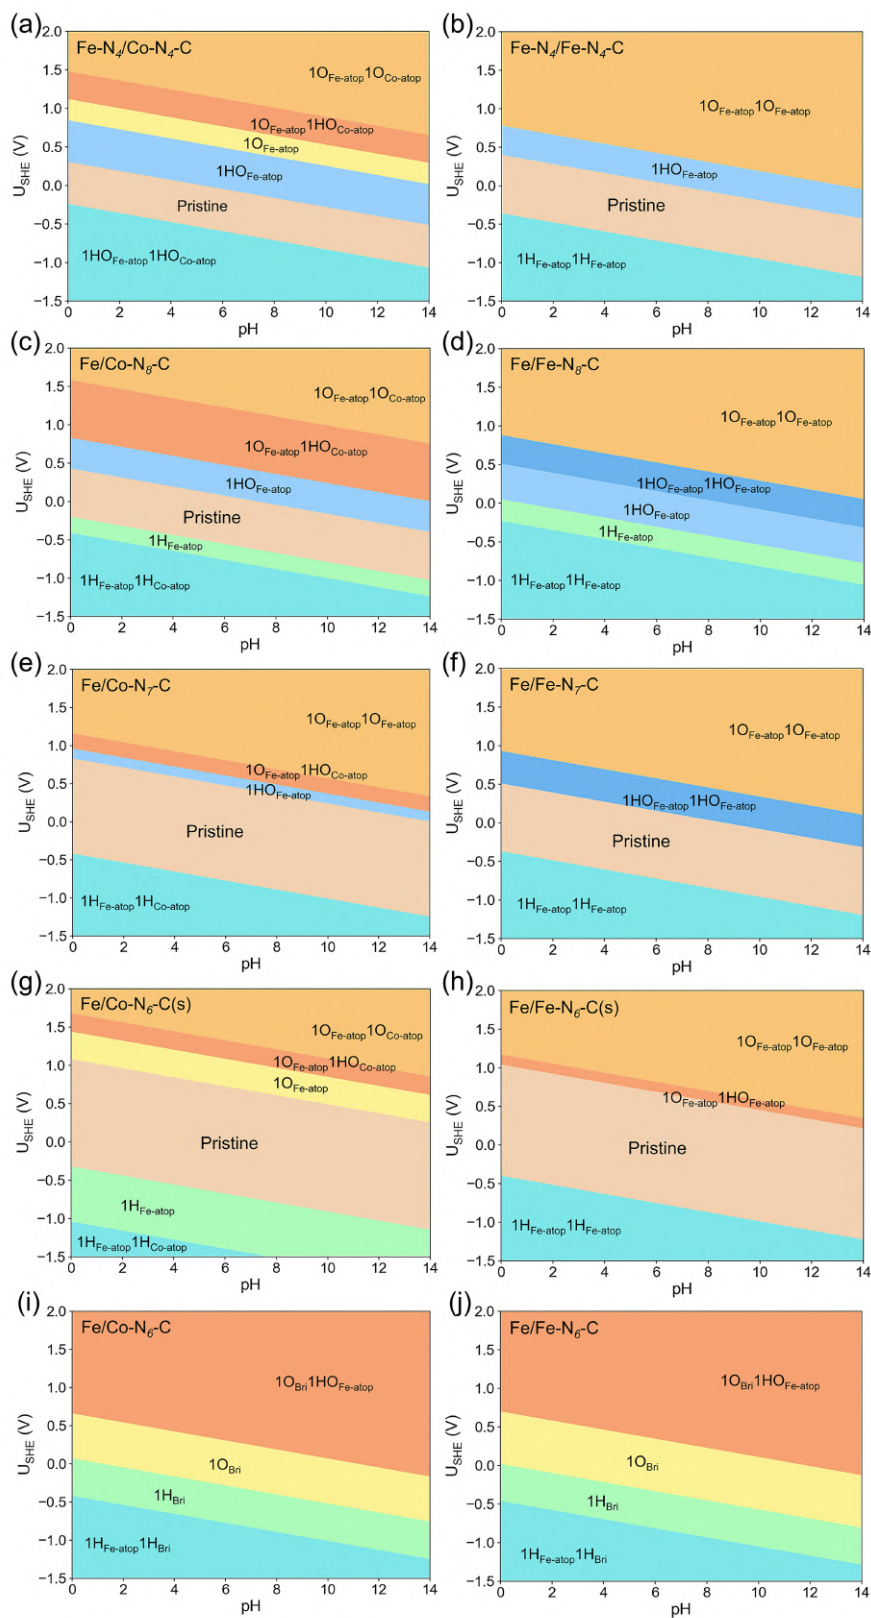

**Fig. S13.** 2D Surface Pourbaix diagrams of DAC and DAC-like materials as the function of pH and potential. (a-j) Surface Pourbaix diagrams in a wide pH range of (a) Fe-N<sub>4</sub>/Co-N<sub>4</sub>-C, (b) Fe-N<sub>4</sub>/Fe-N<sub>4</sub>-C, (c) Fe/Co-N<sub>8</sub>-C, (d) Fe/Fe-N<sub>8</sub>-C, (e) Fe/Co-N<sub>7</sub>-C, (f) Fe/Fe-N<sub>7</sub>-C, (g) Fe/Co-N<sub>6</sub>-C (s), (h) Fe/Fe-N<sub>6</sub>-C (s), (i) Fe/Co-N<sub>6</sub>-C, and (j) Fe/Fe-N<sub>6</sub>-C.

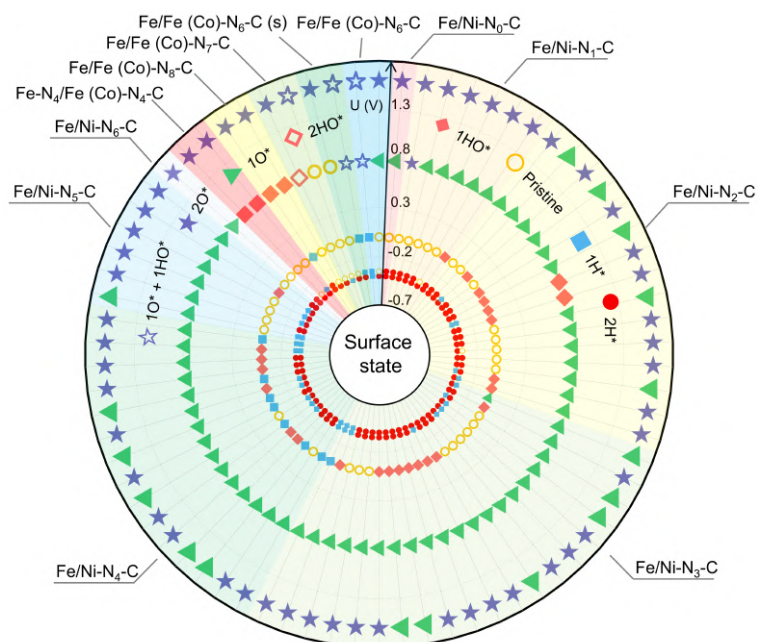

**Fig. S14.** Identified electrochemistry-induced surface coverages of DACs at the characteristic potentials of HER ( $0 \text{ V}_{\text{RHE}}$ ), OER ( $1.60 \text{ V}_{\text{RHE}}$ ), ORR ( $0.78 \text{ V}_{\text{RHE}}$ ), CO<sub>2</sub>RR ( $-0.35 \text{ V}_{\text{RHE}}$ ), and NRR ( $-0.40 \text{ V}_{\text{RHE}}$ ).

## References

1. X. Zheng, Y. Yao, W. Ye, P. Gao, Y. Liu, *Chem. Eng. J.*, 2021, **413**, 128027.
2. Y. Meng, K. Li, D. Xiao, Y. Yuan, Y. Wang, Z. Wu, *Int. J. Hydrogen Energy*, 2020, **45**, 14311-14319.
3. P. Janthon, S. M. Kozlov, F. Vines, J. Limtrakul, F. Illas, *J. Chem. Theory Comput.*, 2013, **9**, 1631-1640.
4. A. A. Peterson, F. Abild-Pedersen, F. Studt, *Energy. Environ. Sci.*, 2010, **3**, 1311–1315.
5. W. Yang, X. Chen, Y. Feng, F. Wang, Z. Gao, Y. Liu, H. Li, *Environ. Sci-Nano*, 2022, **9**, 2041-2050.
6. L. Li, R. Huang, R., X. Cao, Y. Wen, *J. Mater. Chem. A*, 2020, **8**, 19319-19327.
7. G. Xiao, R. Lu, J. Liu, X. Liao, Z. Wang, Y. Zhao, *Nano. Res.*, 2022, **15**, 3073–3081.
8. N. Yang, X. Zheng, L. Li, *J. Phys. Chem. C*, 2017, **121**, 19321-19328.
9. Y. Yang, H. Zhang, Z. Liang, Y. Yin, B. Mei, *J. Energy Chem.*, 2020, **44**, 131-137.
10. X. Guo, J. Gu, S. Lin, *J. Am. Chem. Soc.*, 2020, **142**, 5709-5721.
